# Supplementary material for: Simultaneous treatment of phosphorus and fluoride wastewater using acid-modified iron-loaded electrode capacitive deionization: Preparation and performance
Source: Frontiers journal article supplement (doi:10.3389/fenvs.2022.1087231), 2023-01-23
Supplement: Data_Sheet_1.docx [file Data_Sheet_1.docx]

Supplementary Material


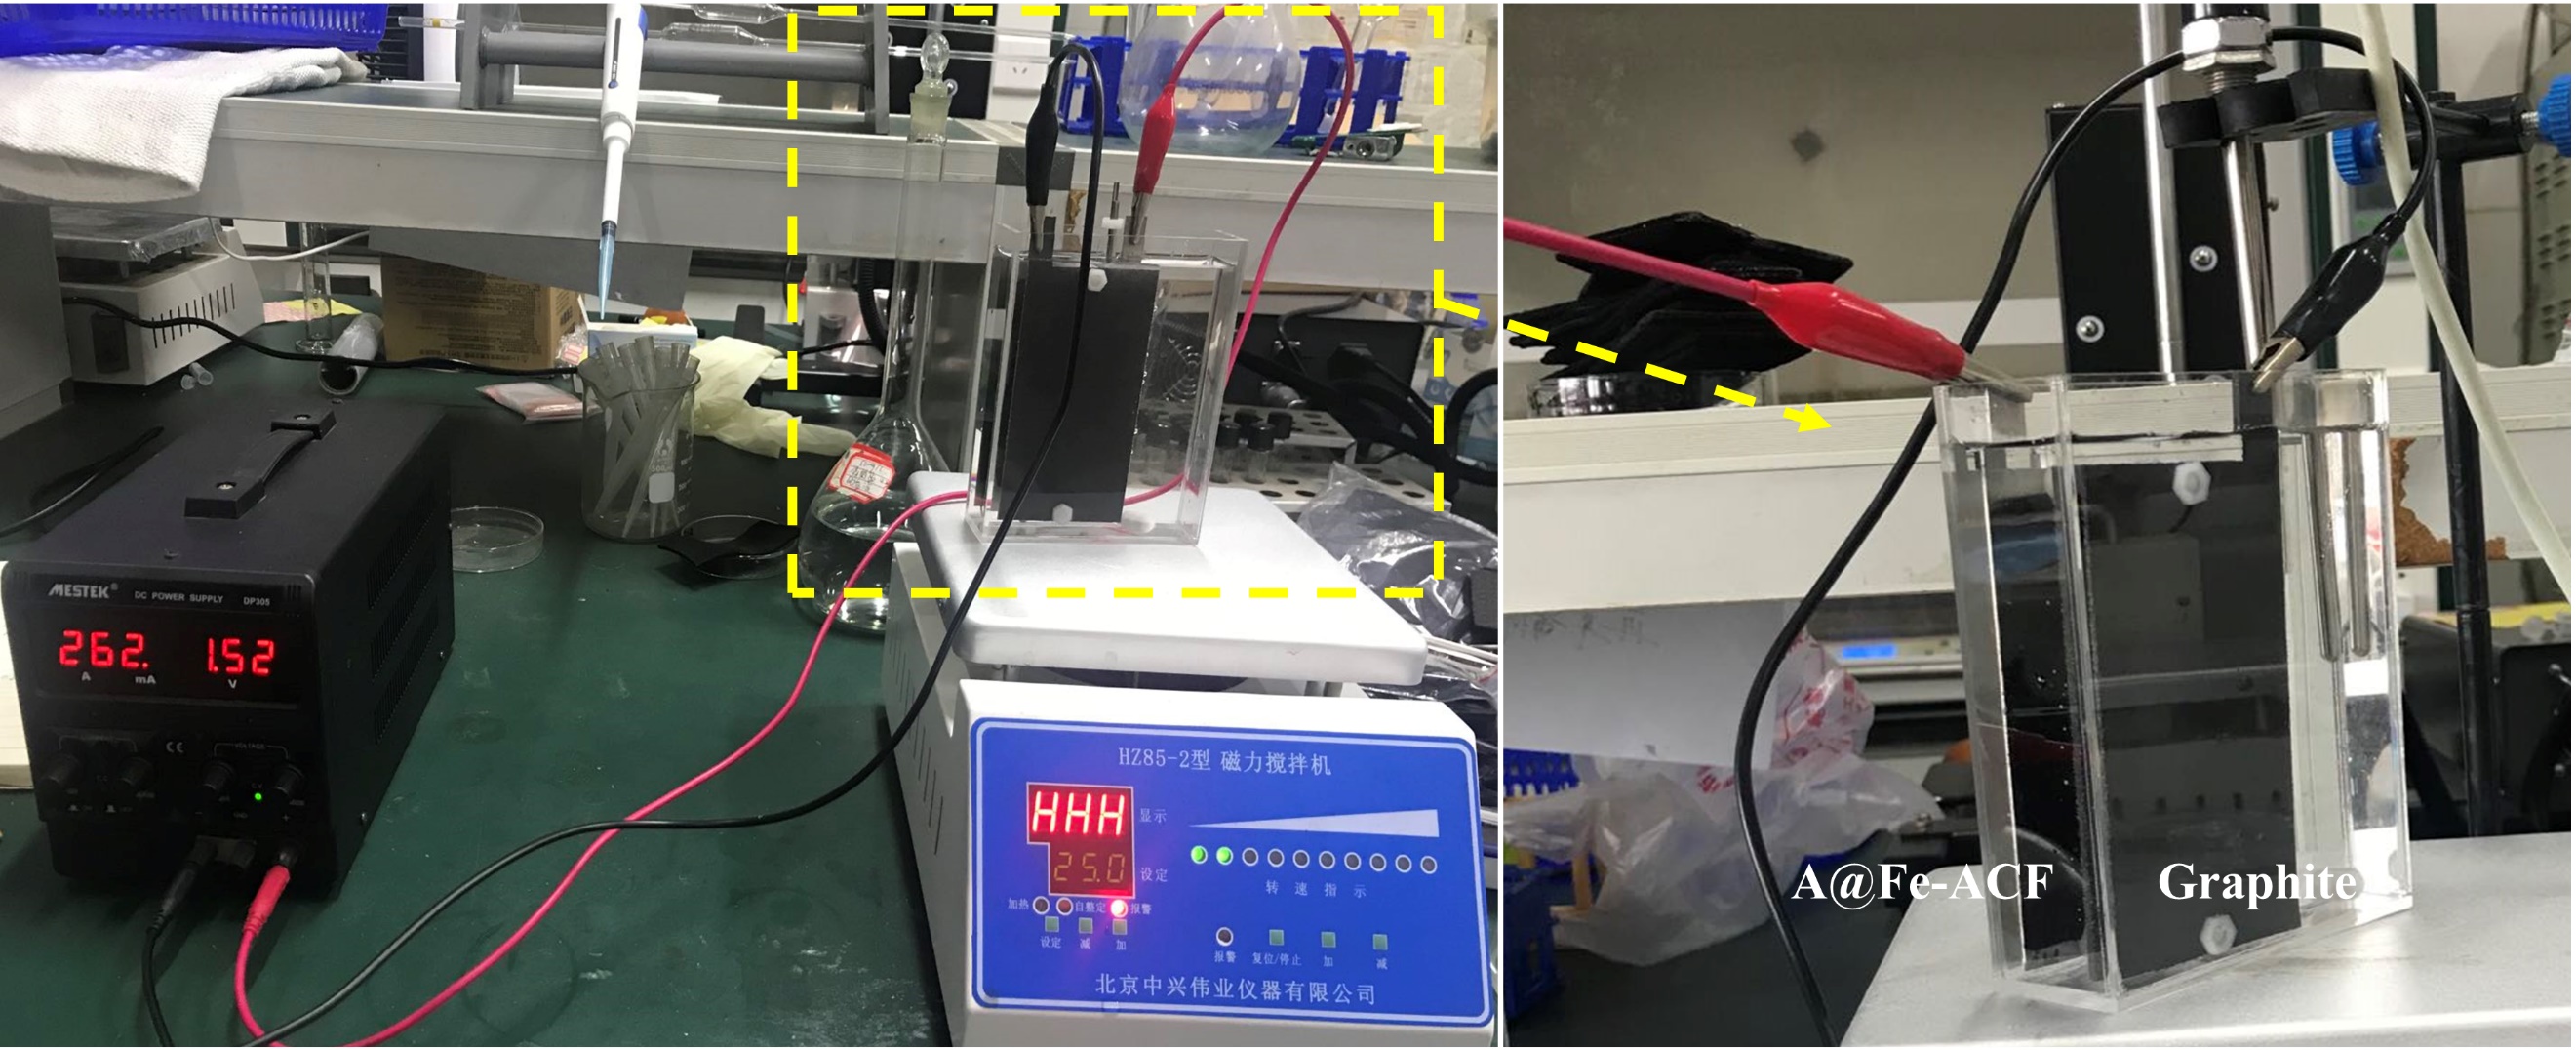


**Fig. S1.** in-situ equipment in the capacitive deionization experiment.


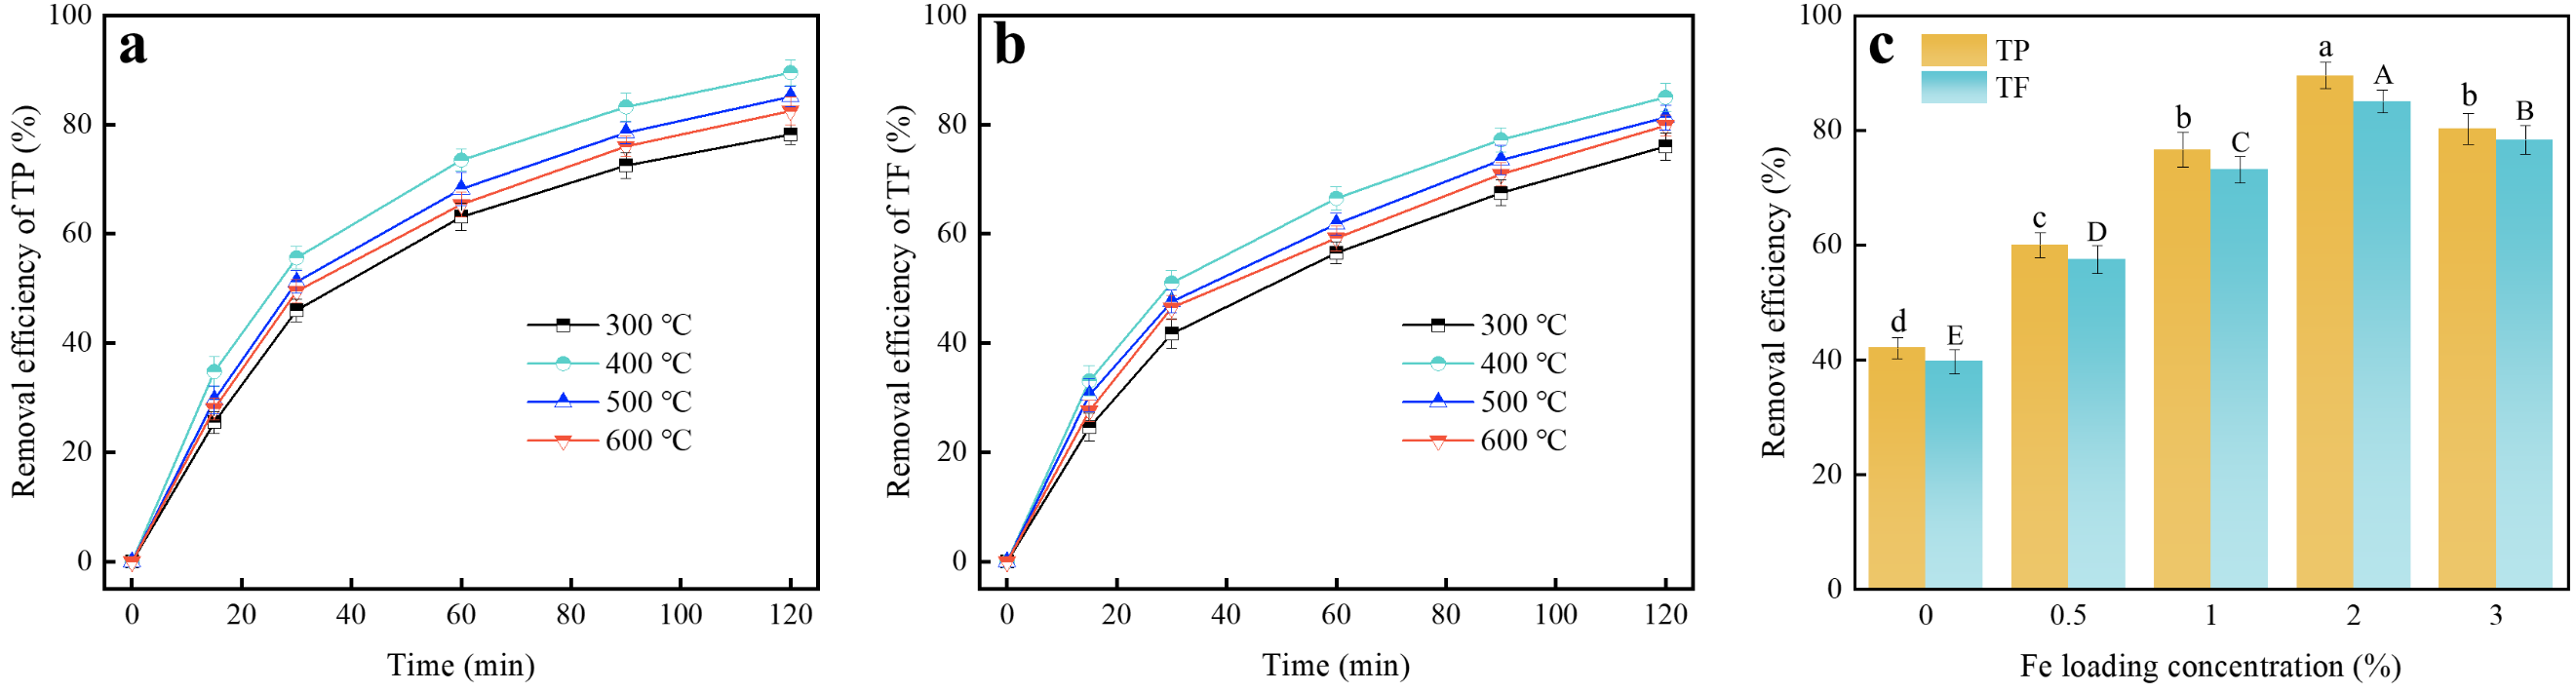


**Fig. S2.** The effect of calcination temperature on CDI performance: (a) removal of TP. (b) removal of TF. (c) The effect of Fe loading concentration on the CDI performance.


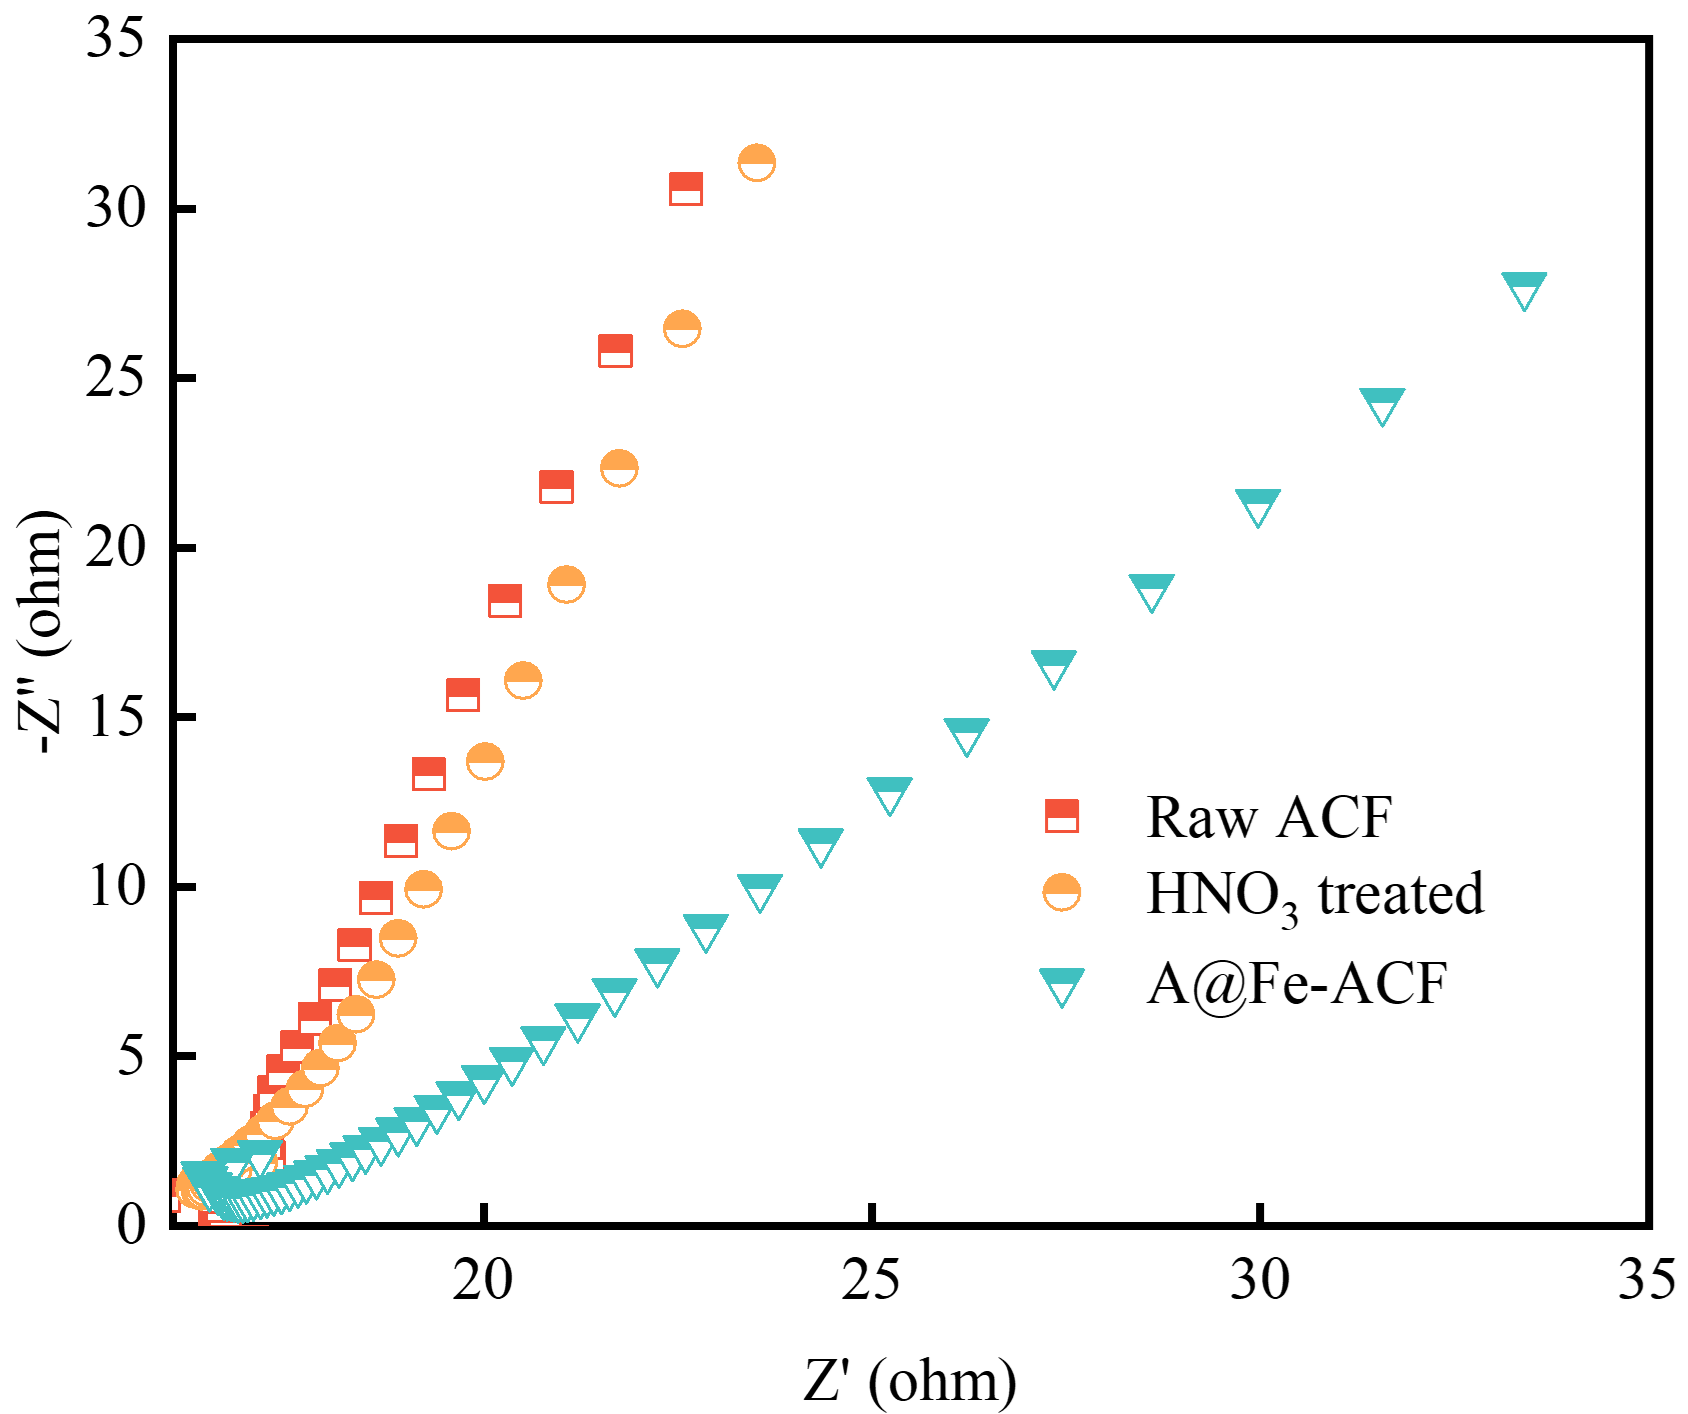


**Fig. S3.** EIS curves of different prepared electrodes (amplitude voltage 5 mV, and the data was collected between the frequency range 0.01 Hz–10 kHz).


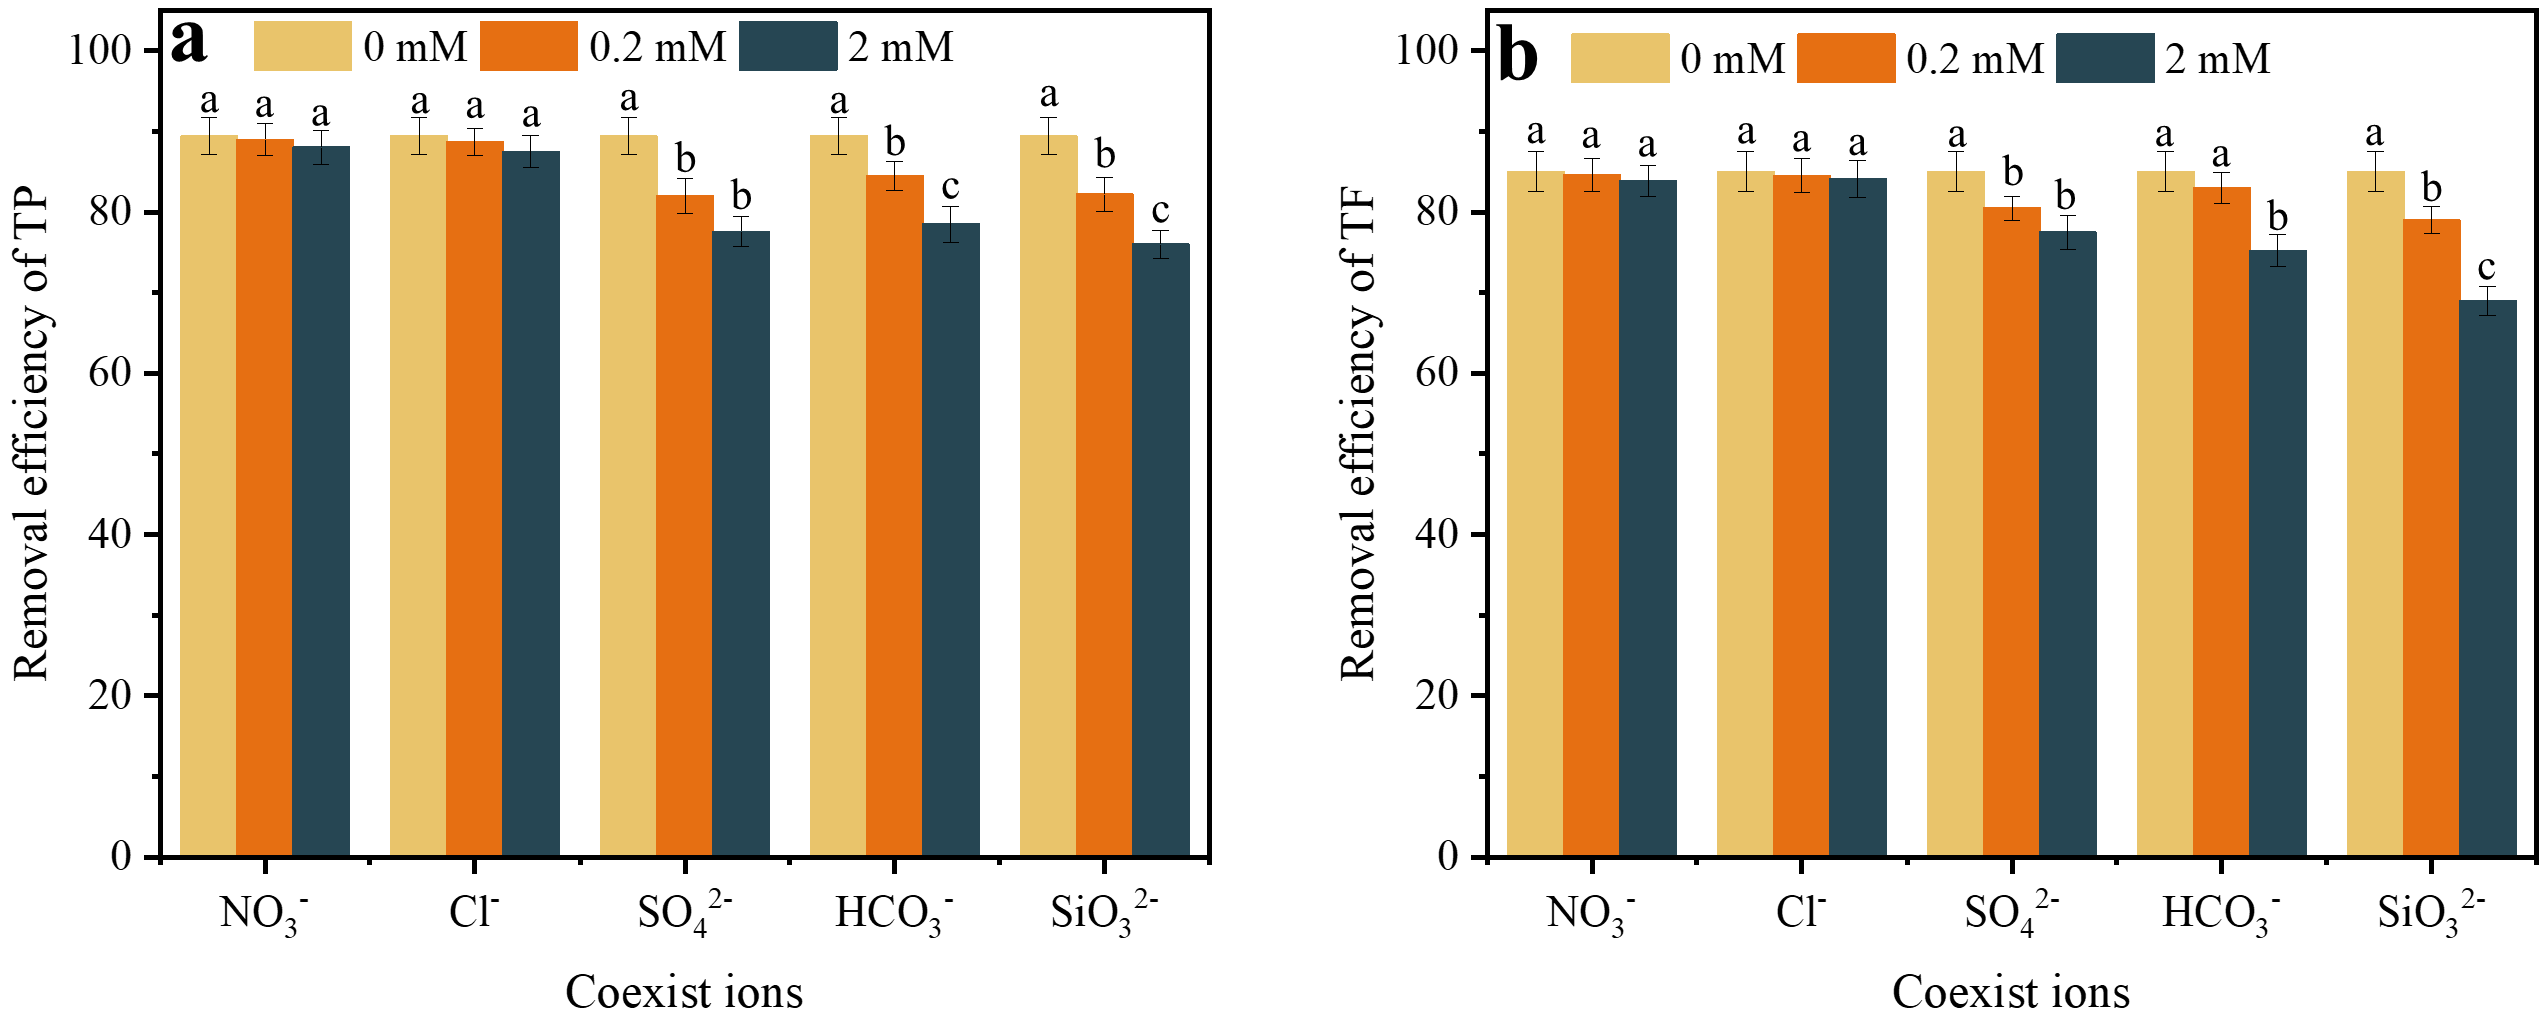


**Fig. S4.** The interference of different anions on A@Fe-ACF-400 adsorption capacity (small letters indicate the difference in removal efficiency for different coexisting ion concentrations).

**
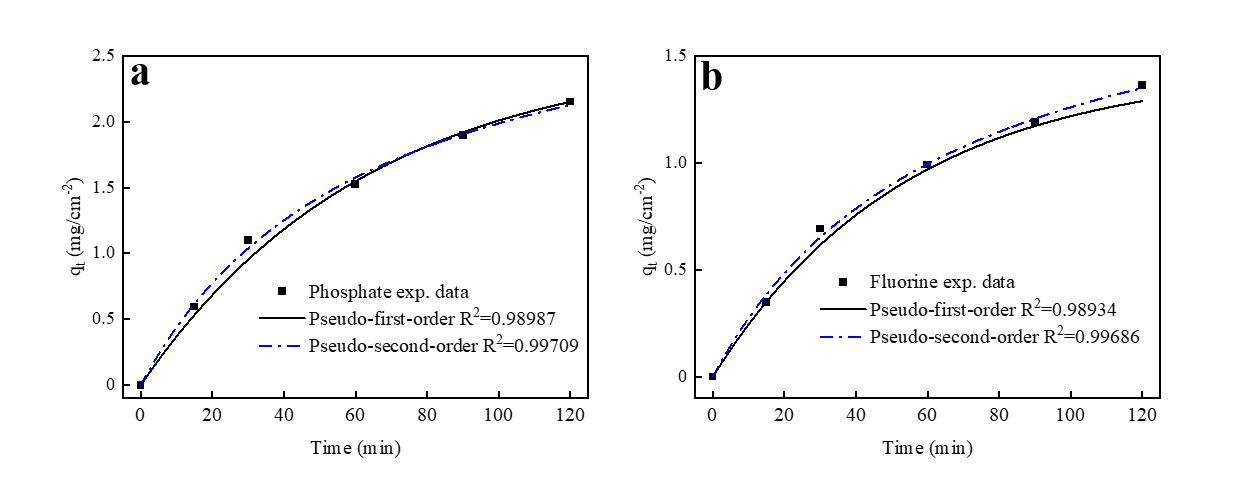
**

**Fig. S5.** Kinetic results simulated by pseudo-first order and pseudo-second order kinetics: (a) phosphate. (b) fluoride.
